1

2 **Experimentally infection of Cattle with wild types of Peste-des-petits-**  
3 **ruminants Virus – Role in its maintenance and spread.**

4

5 Running title : Infection of Cattle with PPRV

6

7 Emmanuel Couacy-Hymann<sup>a,\*</sup>, Valère K. Kouadio<sup>a</sup>, Mathurin Y. Koffi<sup>a</sup>, Arsène  
8 Mossoum<sup>a</sup>, Antoinette Kouassi<sup>a</sup>, Krou Assemian<sup>a</sup>, Privat H. Godji<sup>a</sup>

9 <sup>a</sup> LANADA / Central Laboratory for Animal Diseases, BP 206 Bingerville – Ivory-Coast.

10

11 \*Corresponding author : Emmanuel Couacy-Hymann, LANADA / Central Laboratory for

12 Animal Diseases, BP 206 Bingerville – Ivory-Coast. Email : [chymann@hotmail.com](mailto:chymann@hotmail.com);

13 [chymann@gmail.com](mailto:chymann@gmail.com)

14

15

16

17 Summary

18 PPR is a common and dreadful disease of sheep and goats in tropical regions caused by PPRV  
19 which can infect also cattle without any clinical signs but show a seroconversion. However  
20 the epidemiological role of cattle in the maintenance and spread of the disease is not known.

21 For the purpose of the present study, cattle were infected with a wild candidate from each of  
22 the four lineages of PPRV and placed in separate boxes. Then naive goats were introduced in  
23 each specific box for the 30 days duration of the experiment. The results showed that no  
24 clinical signs of PPR were recorded from these infected cattle along with the in-contact goats.  
25 The nasal and oral swabs remainend negative. However, animals infected with wild types of  
26 PPRV from lineages 1, 3, 4 seroconverted with high percentage inhibition (PI %= values.

27 Only two animals out of three with the Nigeria 75/3 strain of lineage 2 (mild strain) did elicit  
28 a production of specific anti-PPR antibodies in those cattle but with PI% values around the  
29 threshold of the test. Our findings confirm that cattle are dead end hosts for PPRV and do not  
30 play an epidemiological role in the maintenance and spread of PPRV. In a PPR surveillance  
31 programme, cattle can serve as indicators of PPRV infection.

32 Key words : Cattle , small ruminant, PPR, Morbillivirus,

33

34 Importance

35 Peste-des-ptetis-ruminants (PPR) is a major Transboundary Animal disease (TADs) in the  
36 tropical regions which is spreading extensively nowadays to southern and northern of Africa,  
37 Turkey in Europ and southwest Asia. PPR virus is very close related to Rinderpest virus  
38 (RPV) which has been eradicated from the world . Today FAO, WOAHA / OIE and the  
39 scientific community have elected PPR to be the second animal disease to be eradicated  
40 through The PPR Global Eradication Programme (GEP-PPR). Since PPR infects cattle  
41 without any clinical signs but they seroconvert, it is important to explore the role of cattle in  
42 the maintenance and spread of PPRV to better understand the epidemiology of the disease  
43 which will help in the the GEP-PPR.

44

45 Introduction

46 Peste Des Petits Ruminants (PPR) is a serious and contagious plague of small ruminants,  
47 mostly sheep and goats, in many developing countries in Africa, near and Middle-East and  
48 southern Asia (1, 2)). Within Africa, PPR has now extended to southwards in Tanzania,  
49 Democratic Republic of Congo and Angola (3, 4). Outbreaks of PPR have been also reported  
50 across North Africa including Algeria, Morocco, Tunisia (5, 6) along with the European part  
51 of Turkey (7). In southwest Asia, China has reported PPR spread all over the country starting  
52 during year 2007 in Tibet region (8). The current spread of PPR over large geographical areas  
53 is certainly a result of intensified animal movement and trade but may also be due to the  
54 eradication of RPV that affected small ruminants and induced immunity against PPR. Animal  
55 of all ages are susceptible and the transmission route remains oral and respiratory secretions  
56 following close contact between infected and naive population (9).

57 The causative agent, Peste Des Petits Ruminants Virus (PPRV) is a negative-stranded RNA  
58 virus with a monosegmented genome of length 15,948 and containing six genes encoding six  
59 structural proteins. It belongs to family *Paramyxoviridae* and the genus *Morbillivirus* together  
60 with Rinderpest Virus (RPV), Measles Virus (MV), Canine Distemper Virus (CDV) and  
61 marine mammalian Morbilliviruses (10, 11). There are four lineages of PPRV based on the  
62 differentiation determined by the sequence comparison of a small region of the F gene (12) or  
63 the N gene (13). However, it has been demonstrated recently that the N gene is more  
64 divergent therefore more suitable for phylogenetic distinction between closely related PPRV  
65 viruses (14).

66 The disease is highly contagious and case fatality rates in some outbreaks can approach 90%  
67 in susceptible populations and, as a consequence of the effects of epidemics, the local and  
68 rural economies of the affected countries can be devastating (15, 16). Nowadays there are  
69 efficient attenuated vaccines to be used to prevent this disease and to control its extension (17,  
70 18).

71 PPRV infects also cattle but only causes disease in small ruminant species while a specific  
72 seroconversion to PPR is observed in cattle (19). However, a high mortality of domestic  
73 buffaloes (*Bubalus bubalis*) was noted in India caused by an infection with PPRV (20). Even  
74 though this situation has not been reported again, there is a necessity to clarify it  
75 experimentally and by collection of data from rural communities where mixed species (cattle  
76 and small ruminants) graze together.

77 The present study aimed to investigate the epidemiological role of cattle in the maintenance  
78 and spread of PPRV among cattle and small ruminants' populations.

79

80

81

82

83

84

85

86

87 **Material and Methods**

88 **Animal**

89 Cattle : 15 individuals (N'dama breed), two-three years old, were randomly selected from a  
90 farm belonging to the Centre for Research in Agronomy (CNRA – La Mé), located at  
91 approximatively, 30 kms from Abidjan. They were tested as being negative for antibodies to  
92 PPRV using a competitive ELISA (21). Then they were housed in boxes with separate feeding  
93 and drinking tanks. These animals were treated with the anthelmintic Albendazole (10mg/kg)  
94 two times during the acclimatisation period lasting ten days.

95

96 Goats : 15 West African dwarf goats, randomly selected from the same centre (including  
97 seven control goats), aged one - two years, which were tested negative for the presence of  
98 antibodies against PPR by PPR competitive ELISA (c-ELISA) (21), were used for the study.  
99 Each animal was treated with the anthelmintic Albendazole (7.5 mg/kg) two times during the  
100 acclimatisation period (including infected control and uninfected control goats).

101

102 After 10 days for the acclimatisation period, the 15 individuals cattle were, at random, divided  
103 in four groups of three each with the fifth group (control) having also three animals. Each  
104 group was randomly assigned to one specific box corresponding to a specific PPRV lineage  
105 (Table1).

106

107 All animals in the experiment were earmarked with a unique identification number.

108

109 Virulent isolates used in challenge

110 Four virus isolates were obtained from the virus bank of CIRAD-Montpellier (France)  
111 representing viruses from different geographical regions and belonging to different lineages  
112 based on the sequences of their nucleoprotein (NP) gene (14, 22): CIV89 (Lineage 1),  
113 Nigeria 75/3 (lineage 2), Ethiopia (lineage 3), India-Calcutta (lineage 4).

114

115

116

117 Virulent challenge

118 Each individual cattle (except uninfected controls) was infected subcutaneously with 1 mL of  
119 the various challenge viral suspensions, at a concentration of  $10^3$  TCID<sub>50</sub>/mL. Animals were  
120 kept separately in boxes. Three cattle were not infected and used as controls.

121

122 Infected Control goats : two goats were infected subcutaneously with 1 mL of CIV89 strain,  
123 at a concentration of  $10^3$  TCID<sub>50</sub>/mL and two goats infected with India-Calcutta strain at the  
124 same concentration.

125

126 Uninfected control goats : three goats were not infected.

127

128 Twenty four hours (24h) after the virulent challenge of cattle, randomly two uninfected and  
129 naive goats were introduced into each box already containing infected cattle with a sepecific  
130 challenge strain of PPRV.

131 Infected goats with CIV89 and with India-Calcutta strains respectively, were kept in separated  
132 boxes in another animal building. Uninfected control goats were kept in a different box in the  
133 same building.

134

135 An attendant was assigned to each box to feed and water the infected and control animals.

136 Animals were examined daily for classical signs of PPR and body temperatures were recorded  
137 for first ten days post infection (pi) then only for clinical examination up to 30 days pi for  
138 cattle.

139

140 The study was approved by the Ethics Committee of LANADA – Abidjan and by the National  
141 Ethics Committee - Ivory-Coast. In addition the principal investigator and corresponding  
142 author was certified from the **International Council for Laboratory Animal Science**  
143 (ICLAS).

144

145

146

147

148

149

150 **Sample collection**

151 Serial bleeding was performed on all animals at : day0, day2, day5, day7, day9 then day15,  
152 day30 post infection (end of the study) for cattle and in-contact goats and up to day8 for  
153 infected control goats. Serum was separated and samples stored at -20°C until examined.

154

155 Swab : ocular and nasal swabs were collected at day0, day2, day5, day7, day9 then day15,  
156 day21 and day30 post infection, for cattle and in-contact goats. Individual sterile swabs were  
157 used in the present experiment. In the Centre, collected swab samples were kept in liquid  
158 nitrogen to prevent any degradation of biological materials. At the laboratory, swabs were  
159 transferred to a  $-80^{\circ}\text{C}$  freezer until used for analysis.

160

#### 161 Serological test

162 A competitive ELISA (cELISA) kit (CIRAD-Montpellier, France), based on a recombinant  
163 NP was used to detect specific antibodies against PPR (21)) following recommended  
164 protocols. Fifty microlitres were used throughout. Maxisorp 96-wells plates were coated with  
165 the recombinant NP antigen diluted 1/1600 in PBS (0.01 M, pH 7.2–7.4) and incubated at  
166  $37^{\circ}\text{C}$  for 1 h on an orbital shaker. After a cycle of three washes in phosphate buffered saline  
167 (PBS; 1/5, 0.05% Tween 20), test serum (5  $\mu\text{L}$ ), was added to 45 $\mu\text{L}$  of blocking buffer (PBS  
168 0.01 M, pH 7.2–7.4; 0.05% Tween 20 (v/v); 0.5% negative sheep serum (v/v)) followed  
169 immediately by the addition of 50 $\mu\text{L}$  of the specific monoclonal antibody (Mab) against the  
170 PPRV NP at a dilution of 1/100 in blocking buffer. Control sera included were, strong  
171 positive, weak positive, negative and a Mab control (0% competition). The plates were  
172 incubated and washed as above. Anti-mouse horse radish peroxidase enzyme conjugate  
173 (DAKO A/S), diluted 1/1000 in blocking buffer, was added and plates incubated as before.  
174 The plates were washed and 50 $\mu\text{L}$  of substrate/ chromogen ( $\text{H}_2\text{O}_2/\text{OPD}$ ) were added and the  
175 colour allowed to develop for 10 min, after which time any reaction was stopped by the  
176 addition of 50 $\mu\text{L}$  of sulphuric acid (1 M.). Plates were read on an ELISA reader (Multiskan  
177 MK II) at an absorbance of 492 nm. Optical density (OD) readings were converted to  
178 percentage inhibition (PI) values using the following formula:

179

180  $\text{PI}\% = 100 (\text{OD in test well} / \text{OD in 0\% control well}) \times 100.$

181 PI% values greater than or equal to 50% were considered positive

182

183

#### 184 Single stranded cDNA synthesis and PCR technique

185 Oral and nasal swabs were processed as described (13). The procedure for RNA isolation was  
186 as recommended by the manufacturer, using the RNeasy Mini Kit (Qiagen, Germany). The  
187 RNA was eluted in 50  $\mu\text{L}$  of nuclease-free water. The RT step was performed by using

188 random hexamer primers (Introgen, Carlsbad, CA., USA) with 10 µL of extracted RNA and  
189 the First-strand cDNA Synthesis Kit (GE Healthcare Europe GmbH, Orsay, France) as  
190 recommended by the manufacturer's protocol. Then, 5 µL of the cDNA obtained was used as  
191 the template for the PCR step in a 200 µL thin wall tube. The PCR was carried out using the  
192 Gene Amp PCR system 2400 (Perkin-Elmer, Applied Biosystems, Paris, France) using a 50  
193 µL reaction mixture with the specific set of primers NP3 (forward: 5' – TCT CGG AAA TCG  
194 CCT CAC AGA CTG) and NP4 (reverse:  
195 5' – CCT CCT CCT GGT CCT CCA GAA TCT) as previously outlined (13) targeting a  
196 fragment of 350 bp on the nucleoprotein (NP) with the following programme: an initial  
197 denaturation step at 95°C for 5 min followed by five cycles with denaturation at 94°C for 30  
198 sec, annealing at 60°C for 30 sec and the extension at 72°C for 30 sec. Then the amplification  
199 process continued for 30 cycles more but in which the annealing temperature was reduced to  
200 55°C. The amplification reaction was terminated by a final extension of 10 min at 72°C .  
201 Negative and positive controls were included in all experiments.

202

203

204

205

206

207 Results

208

209 Clinical response of goats (Infected Control Goats) to infection with PPRV

210 CIV 89 and India-Calcutta isolates

211

212 For both PPRV strains used, the infected goats developed pyrexia after an incubation period  
213 of 2–7 days, with rectal temperatures ranging from 39 to 41°C. Ocular and nasal discharges  
214 developed at day 4 with CIV89 strain and at day7 post-infection with India-Calcutta strain.  
215 Oral ulceration and necrotic lesions appeared at day 5 with CIV89 strain and at day8 with  
216 India-Calcutta. Diarrhoea was recorded in all infected goats. At day8, all infected goats were  
217 humanely slaughtered and samples were taken on autopsy for analysis.

218

219 Uninfected goats (Control goats): No clinical signs were recorded in these control animals

220

221

222 Clinical response of Cattle infected with isolates of PPRV from each of the four lineages

223

224 The PPRV isolates, CIV89, Nigeria 75/3, Ethiopia, India-Calcutta, representing the PPRV  
225 four lineages were used to infect young cattle (three animals / PPRV strain lineage).

226 Rectal temperature remained stable between 38 and 39°C during the observation period. Only  
227 one animal in the CIV89 group reached 39.7°C for 3 days. No clinical signs were recorded  
228 during the whole observation period.

229

230 In-contact goats: No clinical signs were observed in these animals.

231 Control Cattle: No clinical signs were recorded in these control animals as well.

232

233 Serological response of goats to infection with PPRV isolates

234 The four infected goats with CIV89 and India-Calcutta respectively seroconverted at day7 and  
235 the uninfected controls remained sero negative.

236

237

238

239

240

241 Serological response of Cattle to infection with PPRV isolates

242 All the infected cattle with PPRV isolates were negative from day0 to day7 post infection  
243 after analysis of the respective serum samples with the cELISA technique. At day9, 6/12  
244 became positive, 11/12 positive at day15 and 11/12 positive at day30. One animal of group2  
245 (cattle infected with Nigeria 75/3, lineage2) did not seroconvert. The PI values of the positive  
246 individuals in this group 2 ranged between 50 and 54% while these values were above 65%  
247 for positive animals in groups 1, 3 and 4.

248 The control animals remained negative (Table2).

249

250 All in-contact goats introduced in each specific box containing infected cattle with each  
251 specific lineage of PPRV remained negative.

252

253 Detection of viral genome



254 All swab samples (ocular and nasal swabs) from infected cattle with PPRV and in-contact  
255 goats were analysed using the PCR technique on cDNA generated with random hexamers.  
256 This analysis found that all collected swabs were negative along with those taken from control  
257 animals (Table2).

258 Samples collected from slaughtered goats (infected controls) were positive by amplifying the  
259 targeted fragment of 350 bp of the NP gene.

260

## 261 Discussion

262 PPR is a dreadful disease of sheep and goat being a real burden on the development of these  
263 species with goat being affected more severely than sheep (15). Within goat species, there is  
264 a difference in the susceptibility to PPRV between sahelian long-legged goat breed and West  
265 African dwarf goat breed from the tropical forest region with the latest more susceptible (23,  
266 24). Conversely, PPRV is not considered as pathogenic in cattle, domestic, and wild African  
267 buffaloes (*Syncerus caffer*) (25) while they can seroconvert after infection with PPRV (7, 26,  
268 27). However, high case fatality rates (96%) were reported in India in domestic buffaloes  
269 (*Bubalus bubalis*) and the disease was experimentally reproduced in these animals (20, 25). In  
270 Ivory-Coast, a survey on wildlife in the National game park of Comoé during the Global  
271 Rinderpest Eradication Programme (GREP) revealed that 1/56 serum samples and three pools  
272 of five swabs samples each collected from African wild buffaloes (*Syncerus caffer*) were  
273 positive to PPRV (28). This national park harbors some villages having domestic sheep and  
274 goats and contacts with wild ruminants are frequent which contribute to cross-species  
275 transmission of PPRV.

276 No other cases have been reported from India since then or elsewhere in Africa in cattle or  
277 African buffaloes populations. Our study was designed to give an answer to the infection of  
278 cattle with PPRV and to demonstrate whether cattle can play an epidemiological role in the  
279 spread of PPRV infection among cattle and small ruminants' populations. Previous study  
280 implemented in Africa with PPR virus strains from each lineage demonstrated that CIV 89  
281 (Lineage 1) strain is highly virulent followed by India-Calcutta (Lineage4 then Ethiopia  
282 (Lineage3) and finally Nigeria 75/3 strains (Lineage2) (24). In our study, control goats  
283 challenged with CIV89 and India-Calcutta strains developed clinical signs consistent with  
284 PPR and were humanely sacrificed at day8 post infection, which confirmed the virulence of  
285 PPR virus strains used in this experiment. In addition, laboratory analysis on samples

286 collected from these animals confirmed the disease. Infection of cattle with PPRV strains  
287 from each lineage did not show any clinical signs during the observation period of 30 days  
288 along with the in-contact naive goats introduced in the respective boxes like the control cattle  
289 and non-challenged control goats. This result demonstrated that cattle, after infection with  
290 PPRV, there is no replication, at least at the level of the epithelial cells (no investigation of the  
291 others cells such as PBMC) and do not excrete the virus able to contaminate animals in close  
292 contact such as goats placed in the same box. The absence of viral excretion from these  
293 challenged cattle is confirmed by the negative results of the collected swabs using the RT-  
294 PCR technique. Furthermore, recently, authors carried out an experimentally infection of  
295 calves with PPRV and could demonstrate the presence of PPRV antigen and nucleic acid in  
296 blood, plasma and PBMCs during a long period. They concluded that cattle pose no risk in  
297 transmitting the disease as virus was absent of the natural secretion of the animals (29).

298

299 Analysis of the serum samples revealed a seroconversion from day9 post-infection with 6  
300 positive cattle out of 12, in group1 with CIV89, group3 with Ethiopia and group4 with India-  
301 Calcutta strains respectively. At day15, all animals in these groups 1, 3 and 4 became positive  
302 (9/12) and at day30 post-infection, these animals remained positive. However, only 2/3  
303 animals, challenged cattle in group2 with Nigeria 75/3 did seroconvert. The in-contact goats  
304 remained seronegative. Our study showed that, even though there is no viral excretion, the  
305 challenged animals could elicit specific anti-PPR antibodies.

306 These findings from the infected cattle confirmed previous studies where cattle developed  
307 specific humoral response and the production of antibodies to naturally or experimentally  
308 infection with PPRV (10, 29-33) or with the PPR vaccine (25, 34). Furthermore, these data  
309 confirm what is observed in rural communities where small ruminants and cattle co-exist,  
310 grazing together on the same pasture. In consequence, cross-species transmission of PPRV  
311 from small-ruminants to cattle is likely to occur frequently (4). At day7 post-infection, none  
312 of cattle responded serologically to the challenge with PPRV while sheep and goats  
313 seroconvert earlier, at day7 post infection or after vaccination (24). The weak seroconversion  
314 of animals in group2 with Nigeria 75/3 strain (2/3 positive animals with PI values just above  
315 the threshold) seems to be likely linked to the virulence of the strain of PPRV. Indeed,  
316 challenged animals with strains from lineages 1, 3 and 4 induced a correct production of  
317 specific antibodies against PPRV. A study revealed that challenged goats with this PPRV

318 strain 75/3 survived after showing mild to inapparent PPR disease and seroconverted (24).  
319 The present results from group2 confirm previous study where 66 animals seroconverted out  
320 of 93 (71%) young cattle vaccinated with the PPR vaccine 75/1. A second vaccination was  
321 carried out on the 27 negative animals (93-66) to obtain 100% positive animals (34).

322 We have demonstrated that cattle challenged with wild-type PPRV from each lineage do not  
323 excrete the virus in the environment to contaminate in-contact animals. However these  
324 animals seroconvert following a challenge with virulent wild-types PPRV. Therefore cattle  
325 cannot be considered as a PPRV reservoir and do not play an epidemiological role in the  
326 maintenance and spread of PPRV among cattle and small ruminant's populations. Cattle are  
327 regarded as dead end host for PPRV and can rather serve as indicators of PPRV circulation  
328 and useful animal population for surveillance in the context of PPR eradication programme.  
329 The results of this study are of importance to be taken into account in the current PPR global  
330 eradication programme.

331

332

### 333 Acknowledgements

334 We greatly thank the Centre for Research in Agronomy (CNRA-La Mé) for their support in  
335 the implementation of the experiment.

336

337 This work was funded by a Grant from FAO / IAEA (Contract N°5380 170 3103 E3000321.

338 Pers No : 117744.

339

### 340 References

341 1. Shaila MS, Purushothaman V, Bhavasar D, Venugopal K, Venkatesan RA. 1989. Peste  
342 des petits ruminants in India. Vet. Rec. 125, 602.

343

344 2. Taylor WP, al Busaidy S, Barrett T. 1990. The epidemiology of peste des petits  
345 ruminants in the Sultanate of Oman. Vet. Microbiol. 22: 341-352.

346

347

348 3. Food and Agriculture Organization. 2013. Supporting livelihoods and Peste des petits  
349 ruminants (PPR) and small ruminants diseases control.

- 350 4. Lembo T., Oura C., Parida S., Hoare R., Frost L., Fyumagwa R., Kivaria F., Chubwa  
351 C., Kock R., Cleaveland S., Batten C. 2013. Peste des petits ruminants infection  
352 among cattle and wildlife in Northern Tanzania. *Emerging Infectious Diseases*, 19, 12,  
353 2037 - 2040.
- 354
- 355 5. Banyard A.C., Parida S., Batten C., Aura C., Kwiatek A., Libeau G. 2010. Global  
356 distribution of peste des petits ruminants virus and prospects for improved diagnosis and  
357 control. *J Gen Virol*. 91, 2885-2897.
- 358
- 359 6. Ayari-Fakhfakh E., Ghram A., Bouattour A., Larbi I., Gribâa-Dridi L., Kwiatek O. 2011.  
360 First serological investigation of peste-des-petits-ruminants and Rift Valley fever in  
361 Tunisia. *Vet J*. 187, 402-404.
- 362
- 363 7. De Nardi M, Lamin Saleh, S., Batten C., Aura C., Di Nardo A., Rossi D. 2012. First  
364 Evidence of peste des petits ruminants (PPR) virus circulation in Algeria (sahrawi territories):  
365 outbreak investigation and virus lineage identification. *Transbound Emerg Dis*. 59, 214-222.  
366
- 367 8. Ozkul A., Akca Y., Alkan F., Barrett T., Karaoglu T., Dagalp S.B. et al. 2002. Prevalence,  
368 distribution, and host range of Peste des petits ruminants virus, Turkey. *Emerg Infect Dis*. 8,  
369 708-712.
- 370
- 371 9. Wang Z., Bao J., Wu X., Liu Y., Li L., Liu C., Suo L., Xie Z., Zhao W., Zhang W., Yang  
372 N., Li J., Wang S., Wang J.. 2009. Peste des petits ruminants virus in Tibet, China. *Emerg*  
373 *Infectious Dis*. 15, 299-301.
- 374
- 375 10. Couacy-Hymann E., Koffi Y.M., Godji P., Kouassi L.A., Kouakou K.C., Krou A.H.,  
376 Nana P. 2015. Peste Des Petits Ruminants - A Permanent Burden on the Development of  
377 Small Ruminant in Ivory-Coast. *Austin Virol and Retrovirology*. 2, 1, 1008.

378

- 379 11. Gibbs E.P.J., Taylor W.P., Lawman M.P.J., Bryant J. 1979. Classification of peste des  
380 petits ruminants virus as a fourth member of the Genus Morbillivirus. *Intervirology* ,11,  
381 268–74.
- 382
- 383 12. Barrett T., Romero C.H., Baron M., Yamanouchi K., Diallo A., Bostock C.J., Black D.  
384 1993. The molecular biology of rinderpest and peste des petits ruminants. *Ann. Méd. Vét.*137,  
385 77-85.
- 386
- 387 13. Forsyth M.A., Barrett T. 1995. Evaluation of the polymerase chain reaction for the  
388 detection and characterisation of rinderpest and peste des petits ruminants viruses for  
389 epidemiological studies. *Virus Research.* 39, 151-163.
- 390
- 391 14. Couacy-Hymann E., Roger F., Hurard C., Guillou J.P., Libeau G., Diallo A. 2002. Rapid  
392 and sensitive detection of peste des petits ruminants virus by a polymerase chain reaction  
393 assay. *J. Virol. Methods.* 100, 17–25.
- 394
- 395 15. Kwiatek O., Minet C., Grillet C., Hurardy C., Carlssonz E., Karimovz B. Albina E., Diallo  
396 A., Libeau G.. 2007. Peste des Petits Ruminants (PPR) Outbreak inTajikistan. *Journal of*  
397 *Comparative Pathology.* 136, 111-119.
- 398
- 399 16. Lefèvre PC. and Diallo A. 1990. Peste Des Petits ruminants. *Rev. Sci. Tech.*, 9, 935-981.
- 400
- 401 17. Dhar P., Sreenivasa B.P., Barrett T., Corteyn M., Singh R.P., Bandyopadhyay, S.K. 2002.  
402 Recent epidemiology of Peste Des Petits Ruminants Virus (PPRV). *Vet Microbiol.* 88, 153-  
403 159.
- 404
- 405 18. Diallo A., Taylor W.P., Lefèvre P.C., Provost A. 1989. Atténuation d’une souche du  
406 virus de la PPR. Candidat pour un vaccin homologue vivant. *Rev. Elev. Méd. vét. Pays trop.*  
407 42, 311-319.

408

- 409 19. Saravanan P., Sen A., Balamurugan V., Rajak K.K., Bhanuprakash V., Palaniswami K.S.,  
410 Nachimuthu K., Thangavelu A., Dhinakarraj G., Hegde R., Singh R.K. 2010. Comparative  
411 efficacy of peste des petits ruminants (PPR) vaccines. *Biologicals* **38**:479–485.  
412 <http://dx.doi.org/10.1016/j.biologicals.2010.02.003>.  
413
- 414 20. Taylor WP. 1979. Protection of goats against peste des petits ruminants with attenuated  
415 rinderpest virus. *Res.Vet.Sci.* 27: 321-324.  
416
- 417 21. Govindarajan R, Koteeswaran A, Venugopalan A.T., Shyam G, Shaouna S, Shaila MS,  
418 Ramachandran S. 1997. Isolation of pestes des petits ruminants virus from an outbreak in  
419 Indian buffalo (*Bubalus bubalis*). *Vet Rec.* 141,22,573-4.  
420
- 421 22. Libeau G., Prehaud C., Lancelot R., Colas F., Guerre L., Bishop D.H.L., 1995.  
422 Development of a competitive ELISA for detecting antibodies to peste des petits ruminants  
423 virus using a recombinant nucleoprotein. *Research in Veterinary Science* 58, 50–55.  
424
- 425 23. Roeder P. Land Obi T.U., 2000. Reconnaître la peste des petits ruminants Manuel de  
426 terrain. Manuel FAO de sante´ animale, Empress-Livestock, No. 5, 28 p.  
427
- 428 24. Diop M, Sarr J, Libeau G. 2005. Evaluation of novel diagnostic tools for peste des petits  
429 ruminants virus in naturally infected goat herds. *Epidemiol Infect.* 133,4,711-7.  
430
- 431 25. Couacy-Hymann E., Bodjo S.C., Danho T., Libeau G., Diallo A. 2007. Evaluation of the  
432 virulence of some strains of peste-des-petits-ruminants virus (PPRV) in experimentally  
433 infected West African dwarf goats. *The Veterinary Journal*, 173, 1, 180 – 185.  
434
- 435 26. Baron M.D., .Diallo A., .Lancelot R., Libeau G. 2016. Peste des petits ruminants virus.  
436 *Advances in Virus Research.*, 95, 1 - 42. <https://doi.org/10.1016/bs.aivir.2016.02.001>  
437

- 438 27. Abraham G, Sintayehu A, Libeau G, Albina E, Roger F, Laekemariam Y, Abayneh D,  
439 Awoke KM. 2005. Antibody sero-prevalences against peste des petits ruminants (PPR) virus  
440 in camels, cattle, goats and sheep in Ethiopia. *Prev Vet Med.* 70, 51–7.  
441
- 442 28. Abubakar M, Mahapatra M, Muniraju M, Arshed MJ, Khan EH, Banyard AC, Ali Q.,  
443 Parida S. 2017. Serological Detection of Antibodies to Peste des Petits Ruminants Virus in  
444 Large Ruminants. *Transbound Emerg Dis.* 64, 2,513-519.  
445
- 446 29. Couacy-Hymann E., Bodjo C., Danho T., Libeau G., Diallo A., 2005. Surveillance of  
447 wildlife as a tool for monitoring rinderpest and peste des petits ruminants in West Africa. *Rev.*  
448 *Sci. Tech.* 24, 869.  
449
- 450 30. Sen A, Saravanan P, Balamurugan V, Bhanuprakash V, Venkatesan G, Sarkar J, Rajak  
451 KK, Ahuja A, Yadav V, Sudhakar SB, Parida S, Singh RK. 2014. Detection of subclinical  
452 peste des petits ruminants virus infection in experimental cattle. *Virus disease.* 25,3,408-11.  
453
- 454 31. Mornet P., Orue J., Gilbert Y., Thiery G., Sow M. 1956. La peste des petits ruminants en  
455 Afrique occidentale française. Ses rapports avec la peste bovine. *Revue d'Élevage et de*  
456 *Médecine Vétérinaire des Pays Tropicaux*, 9,313–342.  
457
- 458 32. Dardiri A.H., Deboer G.J., Hamdy F.M. 1977. Response of American Goats and cattle to  
459 peste des petits ruminants virus. In: *Proceedings of the 19th Annual Meeting of the American*  
460 *Association of Veterinary Laboratory Diagnosticians*, p. 337–344.  
461
- 462 33. Anderson J., McKay J.A. 1994. The detection of antibodies against peste des petits  
463 ruminants virus in cattle, sheep and goats and the possible implications to rinderpest control  
464 programmes. *Epidemiol Infect.* 112, 25–31.  
465
- 466 34. Holzer B, Hodgson S., Logan N., Willett B., Baron M.D.. 2016. Protection of Cattle  
467 against Rinderpest by Vaccination with Wild-Type but Not Attenuated Strains of Peste des  
468 Petits Ruminants Virus. *Journal of Virology.* 90, 5152-5162. DOI : 10.1128/JVI.00040-16.  
469

470 35. Couacy-Hymann E., Bodjo S.C., Danho T. 2006. Interference in the vaccination of  
471 cattle with rinderpest virus by antibodies against peste des petits ruminants (PPR) virus.  
472 *Vaccine*, **24**, 5679 – 5683.

473

474

475

476

477 .

478

479

480

481

482

483

484

485

486

487

488

489

490

491

492

493

494

495

496

497

498



499

500

501

502

503

504

505

506

507

508

509

510

511

512

513

514

Table1 : Infection of Cattle with each wild type candidate from the four PPRV lineages

|                                                              | Group1-Box1                                          | Group2-Box2  | Group3 - Box3 | Group4 - Box4  | Group5-Box5    |
|--------------------------------------------------------------|------------------------------------------------------|--------------|---------------|----------------|----------------|
| PPRV strains                                                 | Lineage1 :                                           | Lineage2 :   | Lineage3 :    | Lineage4 :     | Control Cattle |
| Species                                                      | CIV89                                                | Nigeria 75/3 | Ethiopia      | India-Calcutta |                |
| Cattle                                                       | 732                                                  | 743          | 752           | 695            | 780            |
|                                                              | 761                                                  | 764          | 772           | 741            | 781            |
|                                                              | 772                                                  | 782          | 776           | 767            | 785            |
| 24h after infection : Introduction of naive in-contact goats |                                                      |              |               |                |                |
| In-contact                                                   | 1.1                                                  | 2.1          | 3.1           | 4.1            |                |
| Goats                                                        | 1.2                                                  | 2.2          | 3.2           | 4.2            |                |
| Separated building                                           |                                                      |              |               |                |                |
| Infected                                                     | Box1 :                                               |              |               | Box2 :         |                |
| Control goats                                                | CCIV1*                                               |              |               | CInd1**        |                |
|                                                              | CCIV2                                                |              |               | CInd2          |                |
| Control Naïve goats                                          | CN1***, CN2, CN3 : Uninfected control goats in box 4 |              |               |                |                |

(\*) : Control goat infected with CIV89.

(\*\*) : Control goat infected with India Calcutta.

(\*\*\*) : Control naive goat : no challenge with any PPRV strain.

Table2 : PPR specific antibodies and genome detection Results after infection of cattle with wild type of PPRV

| Lineage                | Animal Identification | cELISA  |                          |          | RT-PCR   |
|------------------------|-----------------------|---------|--------------------------|----------|----------|
|                        |                       | Day9 pi | Day15 pi                 | Day30 pi |          |
|                        | 732                   | +       | +                        | +        |          |
| 1                      | 761                   | +       | +                        | +        | Neg      |
|                        | 771                   | +       | +                        | +        |          |
|                        | 743                   |         | +                        | +        |          |
| 2                      | 764                   | Neg     | -                        | -        | Neg      |
|                        | 782                   |         | +                        | +        |          |
|                        | 752                   | -       | +                        | +        |          |
| 3                      | 772                   | +       | +                        | +        | Neg      |
|                        | 776                   | +       | +                        | +        |          |
|                        | 695                   | -       | +                        | +        |          |
| 4                      | 741                   | -       | +                        | +        | Neg      |
|                        | 767                   | +       | +                        | +        |          |
| Control cattle         | 780                   |         |                          |          |          |
|                        | 781                   | Neg     | Neg                      | Neg      | Neg      |
|                        | 785                   |         |                          |          |          |
| In-contact goats       | 1.1 – 1.2             |         |                          |          |          |
|                        | 2.1 – 2.2             | Neg     | Neg                      | Neg      | Neg      |
|                        | 3.1 – 3.2             |         |                          |          |          |
|                        | 4.1 – 4.2             |         |                          |          |          |
| Infected control goats | CCIV1 – CCIV2         |         | Positive at day7pi       |          | Positive |
|                        | CIND1 – Cind2         |         | Slaughtered at day8 pi . |          | Positive |
| Control goats          | CN1-CN2-CN3           | Neg     | Neg                      | Neg      | Neg      |

Neg : Negative
